# Supplementary material for: Corneal epithelium in keratoconus underexpresses active NRF2 and a subset of oxidative stress-related genes
Source: PubMed Central journal article supplement (PMC9565379; doi:10.1371/journal.pone.0273807), 2022-10-14
Supplement: pone.0273807.s008.pdf [file pone.0273807.s008.pdf]

IVL

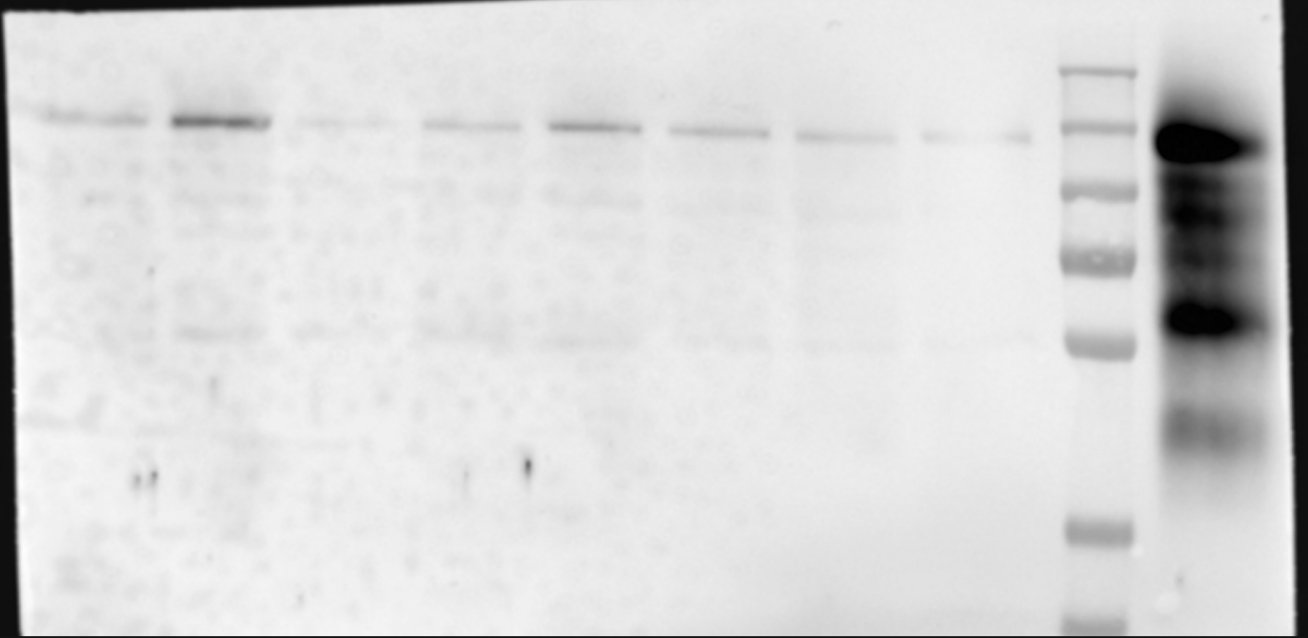

KC samples lane 1-4

Control samples lane 5-8

MW

X

positive  
epiderm  
control

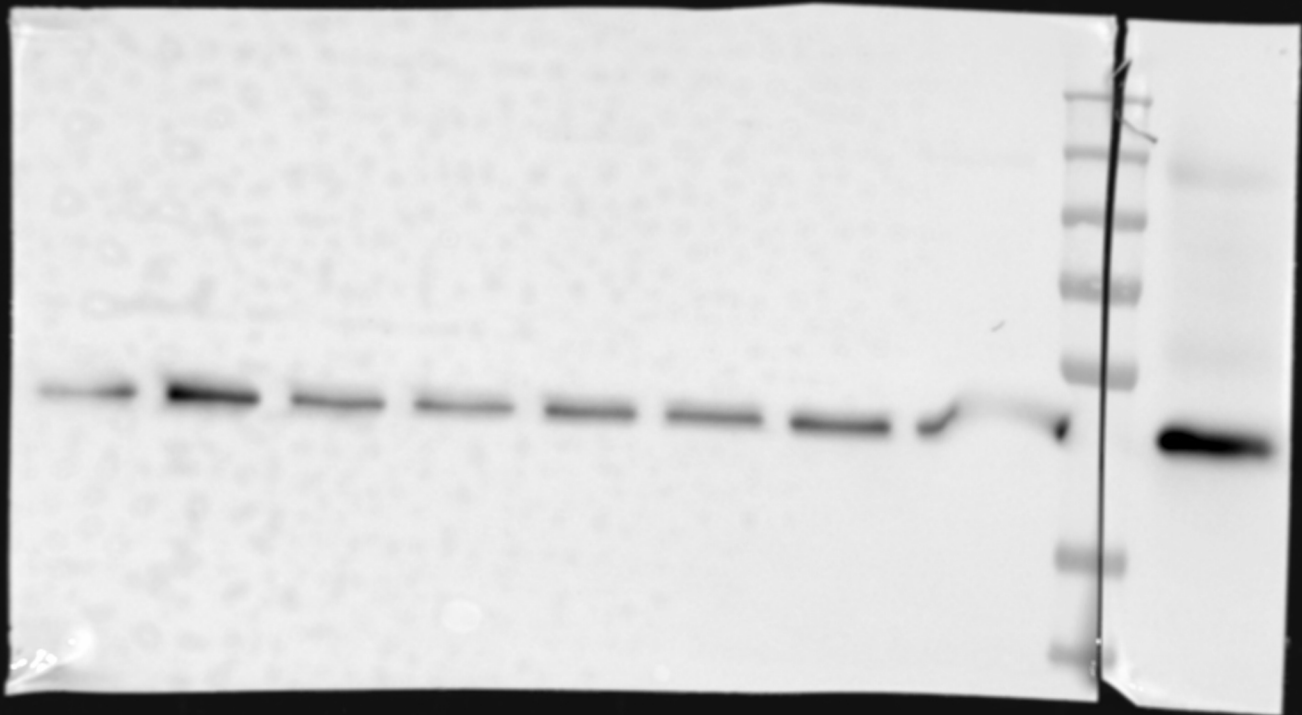

actin

MW

X
